# Supplementary material
Source: PubMed Central journal article supplement (PMC7441911)

Species specificity of the *Alexandrium minutum* PCR assay demonstrated by melting curve analysis.

*A. fundyense* Group I 55? B #) #1 3ŽX` VkWV Group I 6Wf 6aU #  
*A. fundyense* Group I GE59 \$  
*A. andersoni* 55? B #) #1 3ŽX` VkWV Group I 6Wf 6aU #  
*A. tamarensense* 9dgb;;; 55? B #) #1 3ŽX` VkWV Group I 6Wf 6aU #  
*A. ostenfeldii* 55? B #) #1 3ŽX` VkWV Group I 6Wf 6aU #  
*A. insuetum* 55? B \$" \* \$  
*A. hiranoi* 55? B \$\$ #  
*A. leei* 55? B \$' ' \$  
*A. monilatum* 3\_a` ? [eH; ? \$  
*A. monilatum* 3\_a` K= H; ? \$  
*A. ostenfeldii* #) %  
*A. ostenfeldii* 3a8" +% \$  
*A. ostenfeldii* 3a@AD \$  
*A. ostenfeldii* 3aFH3 \$  
*A. ostenfeldii* 3b" "\$  
4\$@D \$  
*A. ostenfeldii* 3b" "\$ 3&@D \$  
*A. ostenfeldii* 3b" "\$ 3\$@D \$  
*A. ostenfeldii* 3b" "\$ (!3@D \$  
/FSTW#fz

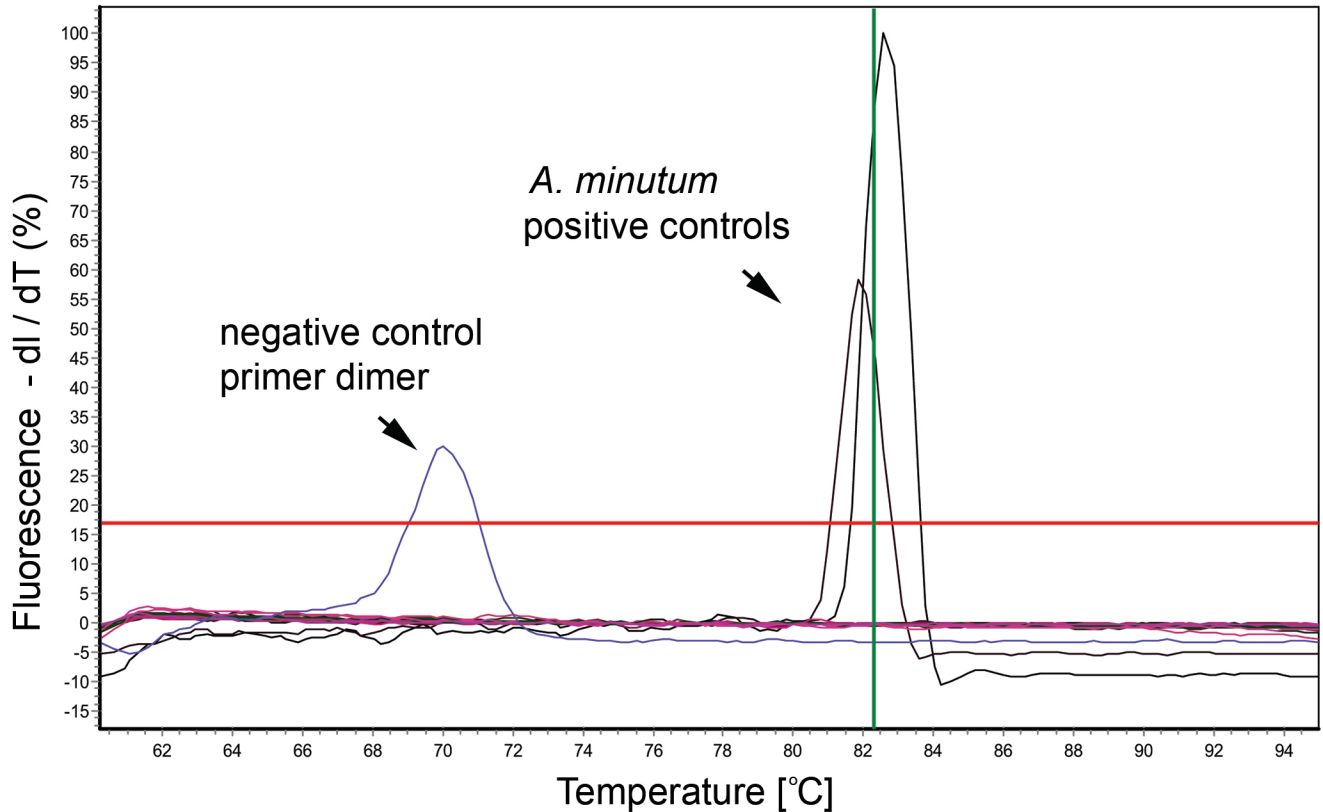

Supplement: NIHMS1006286-supplement-Fig__S5.pdf [file NIHMS1006286-supplement-Fig__S5.pdf]
